# Supplementary material for: Discovery, structure and mechanism of a tetraether lipid synthase
Source: PubMed Central journal article supplement (PMC9433317; doi:10.1038/s41586-022-05120-2), 2022-07-26
Supplement: 41586_2022_5120_MOESM1_ESM.pdf [file 41586_2022_5120_MOESM1_ESM.pdf]

## Supplementary information

---

# Discovery, structure and mechanism of a tetraether lipid synthase

---

In the format provided by the  
authors and unedited

Supplementary Information for:

**Discovery, structure, and mechanism of a tetraether lipid synthase**

**Authors:** Cody T. Lloyd<sup>1</sup>, David F. Iwig<sup>2</sup>, Bo Wang<sup>2</sup>, Matteo Cossu<sup>4</sup>, William W. Metcalf<sup>4,5</sup>,  
Amie K. Boal<sup>1,2†</sup>, and Squire J. Booker<sup>1,2,3†</sup>

**Affiliations:** <sup>1</sup>Department of Biochemistry and Molecular Biology, Pennsylvania State University, University Park, PA; <sup>2</sup>The Howard Hughes Medical Institute, Pennsylvania State University, University Park, PA, USA; <sup>3</sup>Department of Chemistry, Pennsylvania State University, University Park, PA, USA; <sup>4</sup>Department of Microbiology, University of Illinois Urbana–Champaign, Urbana, IL, USA; <sup>5</sup>Institute for Genomic Biology, University of Illinois Urbana–Champaign, Urbana, IL, USA

Figures S1-S6

Table S1-S2

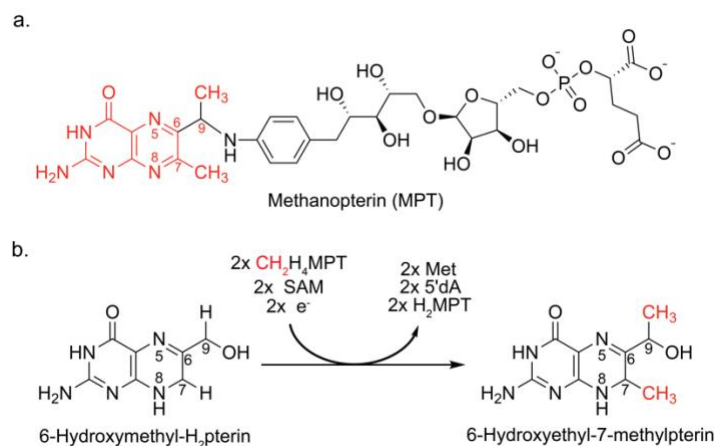

**Supplementary Figure 1. Initial annotation of MJ0619 and the class D RS methylase subclass.** GDGT/MAS was previously annotated as the pioneer enzyme—referred to as MJ0619—for the class D RSMT subclass and was proposed to methylate C7 and C9 on a pterin-like substrate during the biosynthesis of the methanopterin (MPT) cofactor. **a**, Chemical structure of methanopterin (MPT). The C7 and C9 methyl groups and the pterin moiety are in red. **b**, Proposed MJ0619 reaction, wherein each methylation requires SAM, one reducing equivalent, and a methyl donor, which was suggested to be methylenetetrahydromethanopterin ( $CH_2H_4MPT$ ). Moreover, 6-hydroxymethyl- $H_2$ pterin, a precursor in MPT biosynthesis, was hypothesized to be the substrate. Thus 6-hydroxyethyl-7-methylpterin would be the product. The proposed appended methyl groups are colored red.

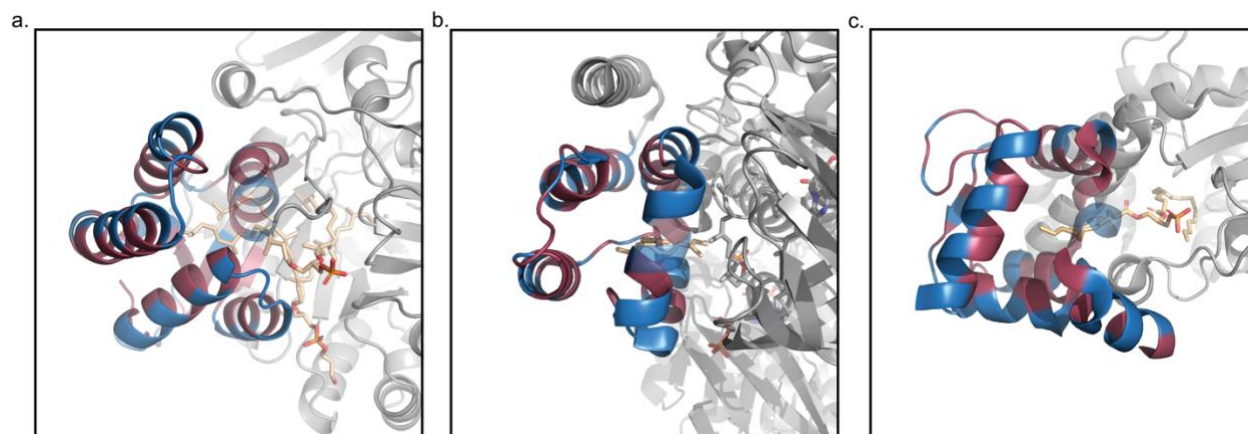

**Supplementary Figure 2. Amphipathic alpha helices observed in known lipid modifying enzymes. a,** GDGT/MAS **b,** Geranylgeranyl reductase (GGR) from *Sulfolobus acidocaldarius* (PDB 4OPC) **c,** cyclopropane fatty acid synthase from *E. coli* (6BQC). **a-c.** The amphipathic alpha-helical lipid-binding domains are colored blue for hydrophilic residues and maroon for hydrophobic residues. The alkyl lipid chains are colored wheat. In all structures, the hydrophobic residues of the lipid-binding domains are oriented towards the interior of the protein.

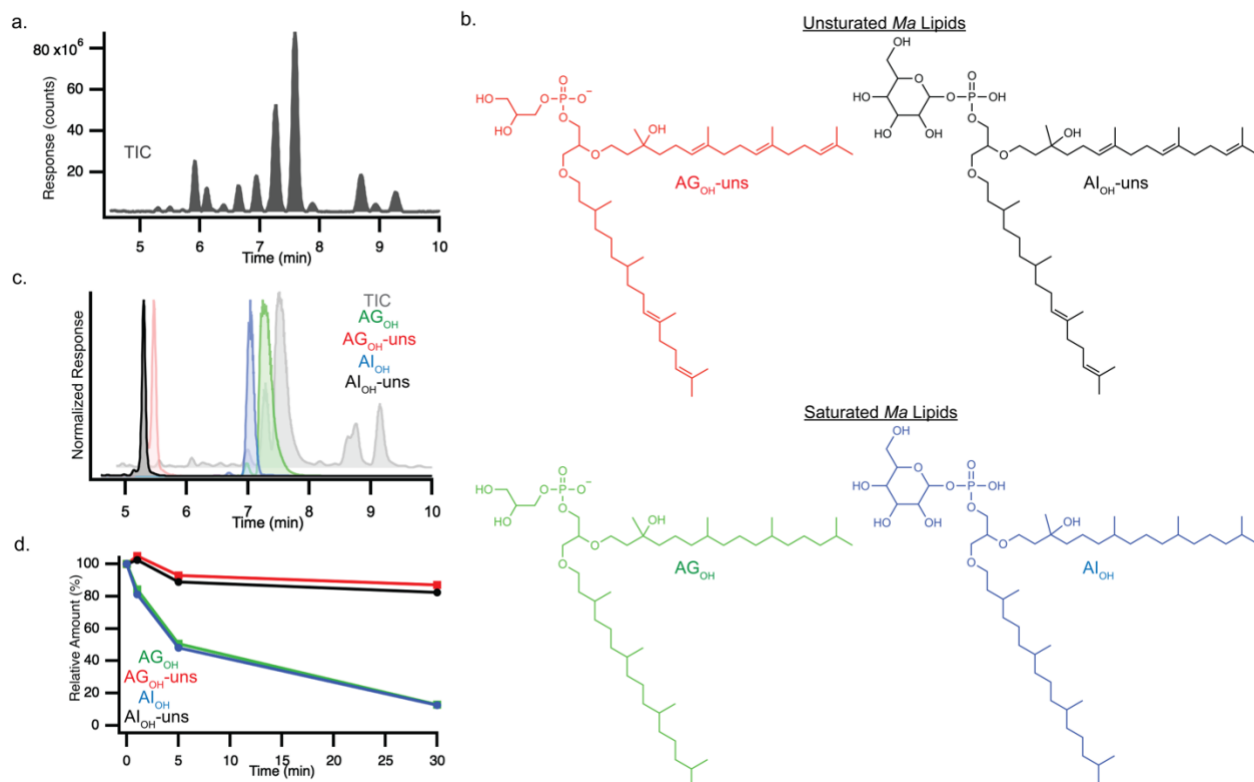

**Supplementary Figure 3. *M. acetivorans* lipid extraction and GDGT/MAS assays with extracted *Ma* lipids. a.** Total-ion chromatogram (TIC, from 4.5 – 10 min) of lipids extracted from *Ma* cell lysate. **b.** Structures of unsaturated and saturated *Ma* lipids monitored throughout the GDGT/MAS reaction. The highest degree of unsaturation detected in *Ma* lipid extract is five degrees of unsaturation observed in AG<sub>OH</sub>-uns and AI<sub>OH</sub>-uns. However, it is unclear where the unsaturations are on the carbon chain. The depicted location within this figure is one possibility. **c.** Extracted-ion chromatograms of saturated and unsaturated *Ma* lipids [3-hydroxyarchaeotidylglycerol (AG<sub>OH</sub>, green trace), unsaturated 3-hydroxyarchaeotidylglycerol (AG<sub>OH</sub>-uns, red trace), 3-hydroxyarchaeotidylinositol (AG<sub>OH</sub>, blue trace), and unsaturated 3-hydroxyarchaeotidylinositol (AG<sub>OH</sub>-uns, black trace)] overlaid with the TIC. **d.** Time-dependent monitoring of *Ma* lipids during a GDGT/MAS activity assay with *Ma* lipid extract as the substrate. These results suggest that GDGT/MAS solely catalyzes the modification of fully saturated (i.e., phytanyl chains) lipids. Trace coloring is identical to panel c.

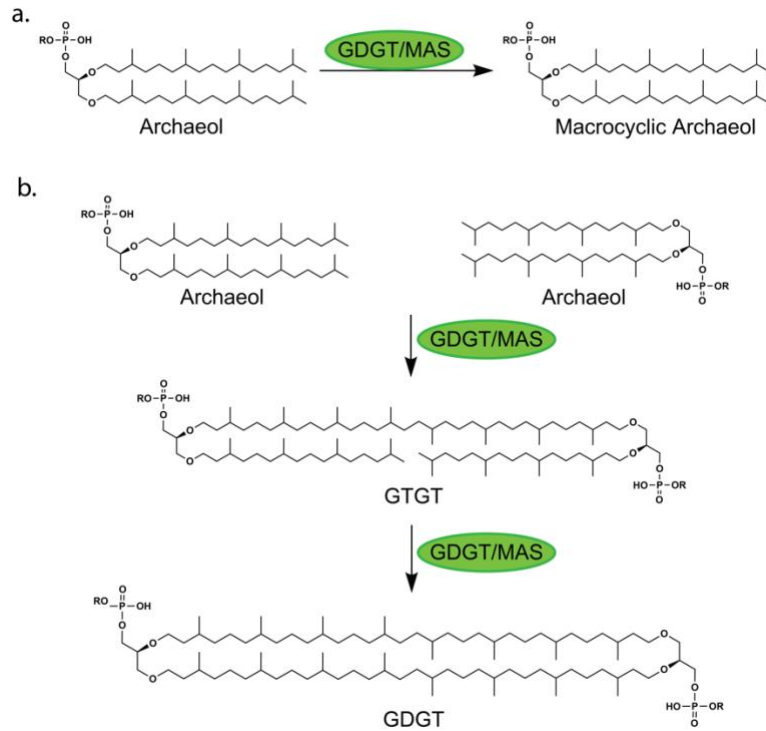

**Supplementary Figure 4.** GDGT/MAS catalyzes formation of the biphytanyl chain during synthesis of (a.) archaeol diether macrocycle and (b.) GDGT.

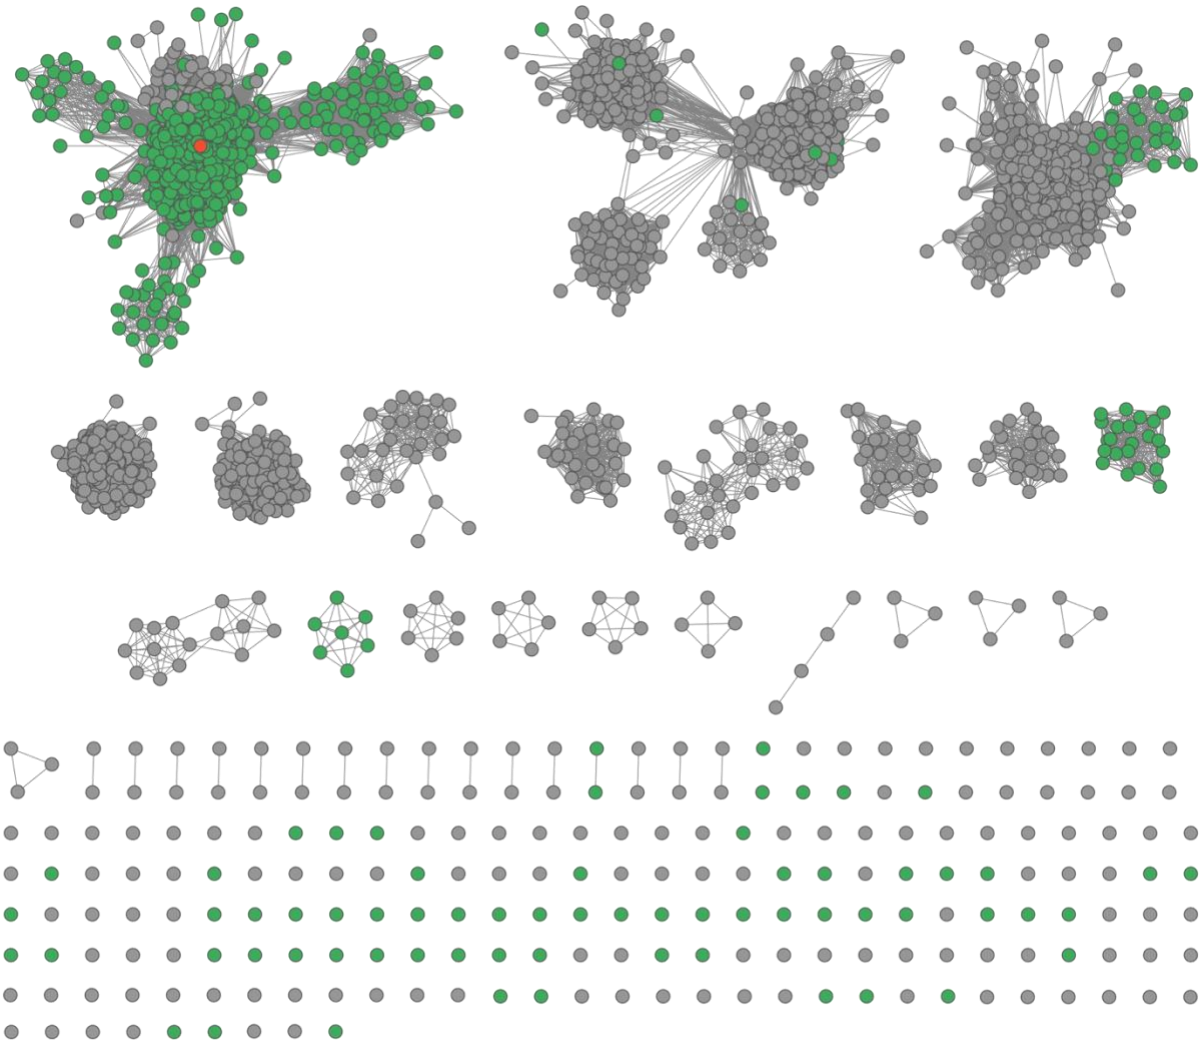

**Supplementary Figure 5. Sequence similarity network of InterPro protein family (IPR034474) associated with GDGT/MAS.** SSN of IPR034474 UniRef90 (2,525 sequences) was generated with an alignment score of 112. Each node represents a single sequence. Sequence clusters and nodes are colored green for Archaea and gray for Bacteria. The red node represents *Mj* GDGT/MAS. This SSN shows that GDGT/MAS homologs exist in archaeal and bacterial organisms.

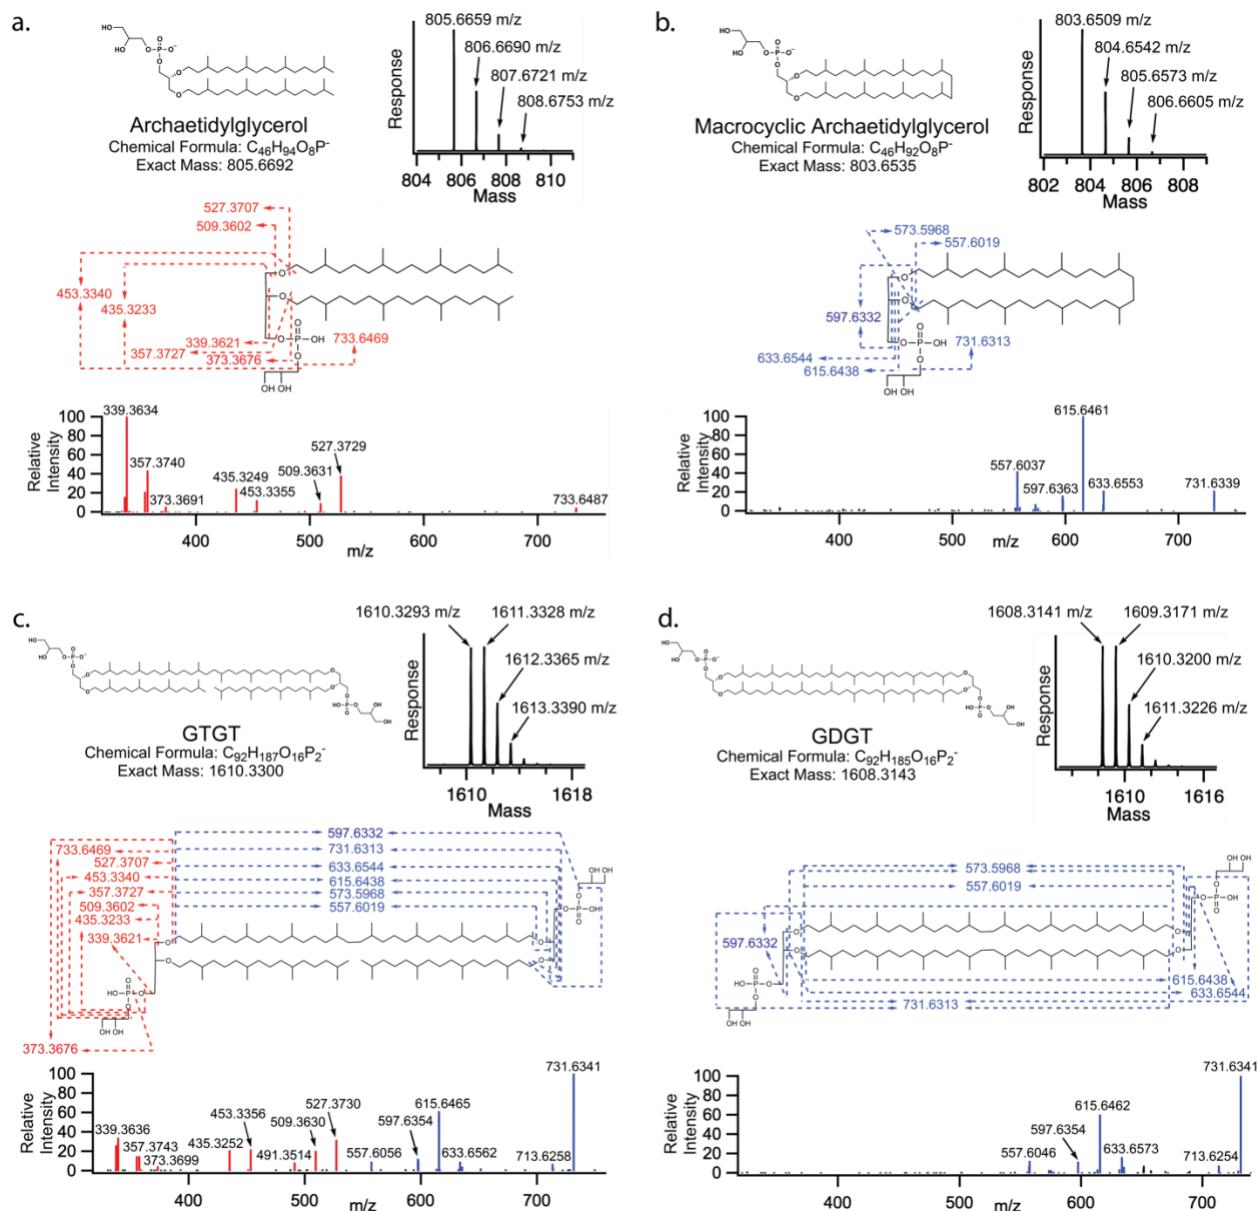

**Supplementary Figure 6. Structural characterization of archaetidylglycerol (AG), macrocyclic AG, GTGT, and GDGT by high-resolution MS and tandem MS/MS.** Panels a-d have an identical layout. **a**, Structural characterization of AG with the structure, chemical formula, and exact mass in the upper left corner of the panel. The mass spectrum in the upper right corner shows the  $m/z$  values observed for AG that result from natural abundance  $^{13}C$ .  $^{13}C$  has a natural abundance of approximately 1.1 percent. Therefore, a molecule with forty-six carbons will result in a mass spectrum with a relative abundance of forty-six percent for the  $m/z$  value of molecules that contain one  $^{13}C$  isotope. The relative responses observed for the natural abundance  $^{12}C$  isotope ( $m/z$  805.6659) compared to the  $^{13}C$  isotope ( $m/z$  values 806.6690, 807.6721, and 808.6753) corroborates that the chemical formula contains forty-six carbon atoms. The product ions resulting from tandem MS/MS fragmentation of AG are shown at the bottom of the panel with dashed lines identifying the location of the fragmented bond and the resulting theoretical  $m/z$ . All observed  $m/z$  values from tandem MS/MS are displayed on the mass spectrum. In the tandem MS/MS spectra, dashed lines and product ions colored red indicate the presence of a phytanyl chain, while blue coloring indicates the presence of a biphytanyl chain. **b**, Macrocyclic archaetidylglycerol **c**, Glycerol trialkyl glycerol tetraether (GTGT) **d**, Glycerol dibiphytanyl glycerol tetraether (GDGT).



| Primer Name            | Primer Sequence (5' to 3')     |
|------------------------|--------------------------------|
| GDGT/MAS_Y459F_Forward | GTTGCTGCATTCATTTTGCAACACCGGATG |
| GDGT/MAS_Y459F_Reverse | CATCCGGTGTTGCAAAATGAATGCAGCA   |
| GDGT/MAS_Y459L_Forward | GTTGCTGCATTCATCTGGCAACACCGGATG |
| GDGT/MAS_Y459L_Reverse | CATCCGGTGTTGCCAGATGAATGCAGCAAC |
| GDGT/MAS_M439A_Forward | GATTAGCTGCGCGCACTTTATGGATGCC   |
| GDGT/MAS_M439A_Reverse | GGCATCCATAAAGTGCGCGCAGCTAATC   |

**Table S1.** Primers used for site-directed mutagenesis of GDGT/MAS

|                 | Figure 6a        | Figure 6a<br>inset | Figure 6b        | Figure 6b<br>inset | Figure 6c        | Figure 6c<br>inset |
|-----------------|------------------|--------------------|------------------|--------------------|------------------|--------------------|
| Mode            | ESI(-)<br>SEC/MS | ESI(-)<br>Direct   | ESI(-)<br>Direct | ESI(-)<br>Direct   | ESI(-)<br>Direct | ESI(-)<br>Direct   |
| SID (eV)        | 110              | 100                | 100              | 110                | 50               | 115                |
| Resolution      | 15,000           | 120,000            | 15,000           | 120,000            | 15,000           | 120,000            |
| Microscans      | 8                | 1                  | 8                | 1                  | 10               | 1                  |
| AGC Target      | 1e6              | 1e6                | 1e6              | 1e6                | 1e6              | 1e6                |
| Funnel RF       | 75               | 75                 | 70               | 75                 | 125              | 65                 |
| Cap. Temp.      | 290              | 290                | 290              | 290                | 300              | 320                |
| HCD nCE<br>(eV) | N/A              | 30                 | N/A              | 30                 | N/A              | 30                 |

**Table S2.** Instrument parameters for native protein mass spectrometry for each mass spectra.
